# Supplementary material for: Transmission Dynamics of SARS-CoV-2 during an Outbreak in a Roma Community in Thessaly, Greece—Control Measures and Lessons Learned
Source: MDPI journal article supplement (doi:10.3390/ijerph18062878), 2021-03-11
Supplement: s1 [file s1]

**Supplementary table 1: Number of confirmed cases and the estimated secondary attack rates for each infected household**

| Index Case characteristics |                           |        |                  |               |                 |                               |                          |                         |                  |
|----------------------------|---------------------------|--------|------------------|---------------|-----------------|-------------------------------|--------------------------|-------------------------|------------------|
| A/A                        | Age Group                 | Gender | Disease Severity | PCR Positives | Secondary cases | Uninfected secondary contacts | Total secondary contacts | Total household members | Household SAR(%) |
| 1                          | ≤12                       | Male   | Asymptomatic     | 2             | 1               | 4                             | 5                        | 6                       | 20,00%           |
| 2                          | ≤12                       | Male   | Asymptomatic     | 1             | 0               | 8                             | 8                        | 9                       | 0,00%            |
| 3                          | 13-19                     | Male   | Asymptomatic     | 1             | 0               | 4                             | 4                        | 5                       | 0,00%            |
| 4                          | 13-19                     | Male   | Asymptomatic     | 1             | 0               | 1                             | 1                        | 2                       | 0,00%            |
| 5                          | 13-19                     | Male   | Asymptomatic     | 1             | 0               | 2                             | 2                        | 3                       | 0,00%            |
| 6                          | 13-19                     | Male   | Asymptomatic     | 1             | 0               | 3                             | 3                        | 4                       | 0,00%            |
| 7                          | 20-39                     | Male   | Asymptomatic     | 1             | 0               | 2                             | 2                        | 3                       | 0,00%            |
| 8                          | 20-39                     | Female | Asymptomatic     | 1             | 0               | 2                             | 2                        | 3                       | 0,00%            |
| 9                          | 20-39                     | Male   | Asymptomatic     | 1             | 0               | 3                             | 3                        | 4                       | 0,00%            |
| 10                         | 40-59                     | Female | Asymptomatic     | 1             | 0               | 1                             | 1                        | 2                       | 0,00%            |
| 11                         | 60+                       | Male   | Asymptomatic     | 1             | 0               | 4                             | 4                        | 5                       | 0,00%            |
| 12                         | 13-19                     | Female | Hospitalized     | 8             | 7               | 1                             | 8                        | 9                       | 87,50%           |
| 13                         | 20-39                     | Male   | Hospitalized     | 3             | 2               | 2                             | 4                        | 5                       | 50,00%           |
| 14                         | 20-39                     | Male   | Hospitalized     | 5             | 4               | 6                             | 10                       | 11                      | 40,00%           |
| 15                         | 20-39                     | Male   | Hospitalized     | 2             | 1               | 6                             | 7                        | 8                       | 14,29%           |
| 16                         | 20-39                     | Male   | Hospitalized     | 7             | 6               | 0                             | 6                        | 7                       | 100,00%          |
| 17                         | 40-59                     | Male   | Hospitalized     | 2             | 1               | 4                             | 5                        | 6                       | 20,00%           |
| 18                         | 40-59                     | Male   | Hospitalized     | 3             | 2               | 11                            | 13                       | 14                      | 15,38%           |
| 19                         | 40-59                     | Female | Hospitalized     | 6             | 5               | 8                             | 13                       | 14                      | 38,46%           |
| 20                         | 40-59                     | Male   | Hospitalized     | 5             | 4               | 3                             | 7                        | 8                       | 57,14%           |
| 21                         | 60+                       | Male   | Hospitalized     | 6             | 5               | 2                             | 7                        | 8                       | 71,43%           |
| 22                         | 60+                       | Female | Hospitalized     | 2             | 1               | 3                             | 4                        | 5                       | 25,00%           |
| 23                         | ≤12                       | Female | Symptomatic      | 1             | 0               | 2                             | 2                        | 3                       | 0,00%            |
| 24                         | 13-19                     | Female | Symptomatic      | 5             | 4               | 3                             | 7                        | 8                       | 57,14%           |
| 25                         | 20-39                     | Male   | Symptomatic      | 10            | 9               | 2                             | 11                       | 12                      | 81,82%           |
| 26                         | 20-39                     | Male   | Symptomatic      | 1             | 0               | 8                             | 8                        | 9                       | 0,00%            |
| 27                         | 20-39                     | Female | Symptomatic      | 1             | 0               | 5                             | 5                        | 6                       | 0,00%            |
| 28                         | 20-39                     | Male   | Symptomatic      | 8             | 7               | 0                             | 7                        | 8                       | 100,00%          |
| 29                         | 20-39                     | Male   | Symptomatic      | 4             | 3               | 1                             | 4                        | 5                       | 75,00%           |
| 30                         | 60+                       | male   | Symptomatic      | 1             | 0               | 1                             | 1                        | 2                       | 0,00%            |
| 31                         | INDEX CASE NOT IDENTIFIED |        |                  | 2             | 1               | 5                             | 6                        | 7                       | 16,67%           |
| 32                         |                           |        |                  | 6             | 5               | 6                             | 11                       | 12                      | 45,45%           |
| 33                         |                           |        |                  | 12            | 11              | 3                             | 14                       | 15                      | 78,57%           |
| 34                         |                           |        |                  | 9             | 8               | 2                             | 10                       | 11                      | 80,00%           |
| 35                         |                           |        |                  | 2             | 1               | 5                             | 6                        | 7                       | 16,67%           |
| 36                         |                           |        |                  | 2             | 1               | 0                             | 1                        | 2                       | 100,00%          |
| 37                         |                           |        |                  | 2             | 1               | 10                            | 11                       | 12                      | 9,09%            |
| 38                         |                           |        |                  | 2             | 1               | 7                             | 8                        | 9                       | 12,50%           |
| 39                         |                           |        |                  | 3             | 2               | 5                             | 7                        | 8                       | 28,57%           |
| 40                         |                           |        |                  | 3             | 2               | 6                             | 8                        | 9                       | 25,00%           |
| <b>Totals</b>              |                           |        |                  | 135           | 95              | 151                           | 246                      | 286                     | 38,62%           |
